# Supplementary material for: A hPSC-based platform to discover gene-environment interactions that impact human β-cell and dopamine neuron survival
Source: PubMed Central journal article supplement (PMC6240096; doi:10.1038/s41467-018-07201-1), 2018-11-16
Supplement: 41467_2018_7201_MOESM1_ESM.pdf [file 41467_2018_7201_MOESM1_ESM.pdf]

# Supplementary Figure 1

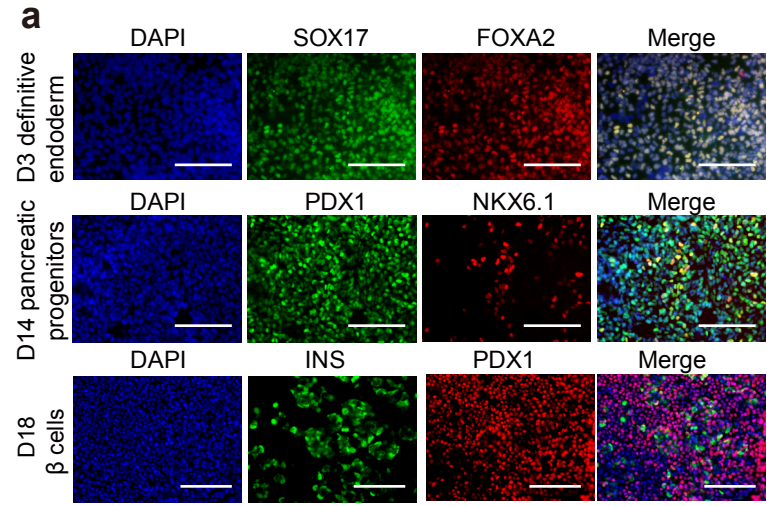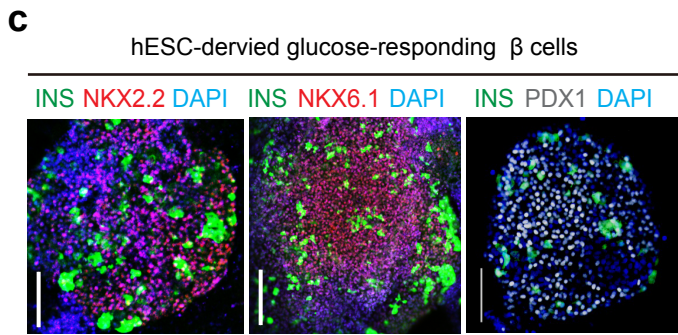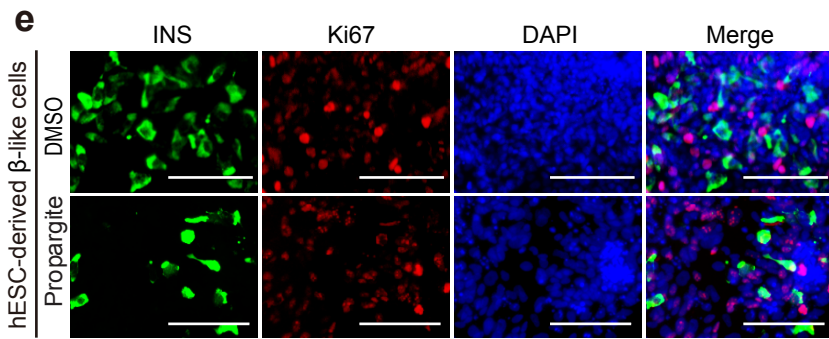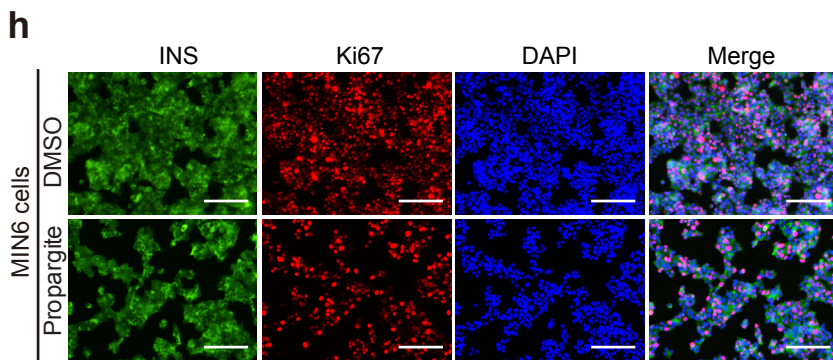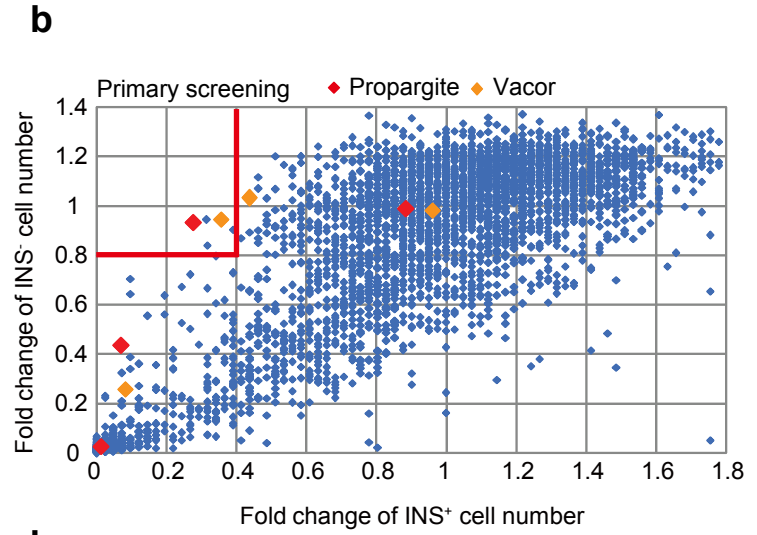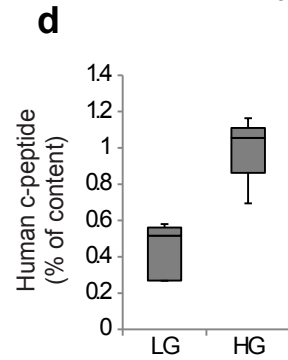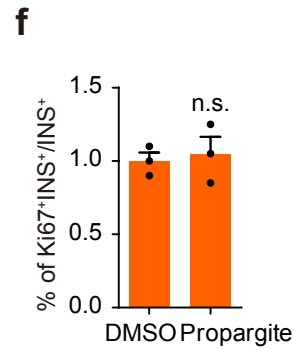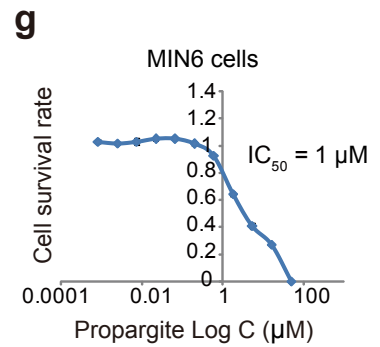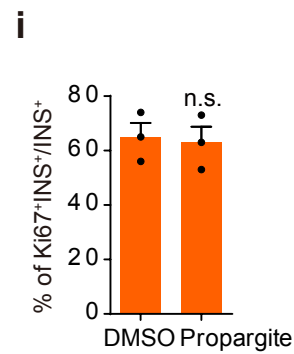

## Supplementary information.

### Supplementary Figure 1. Primary screen and validation of hit compounds.

(a) Immunocytochemistry analysis of hESC-derived definitive endoderm, pancreatic progenitors, endocrine cells and INS<sup>+</sup> cells using the  $\beta$ -cell differentiation protocol 1. (b) Results of ToxCast library screening using the  $\beta$ -cell differentiation protocol 1. The red or orange squares highlight the positive hit compounds. (c, d) Confocal imaging analysis (c) and glucose stimulated insulin secretion (d) to characterize hESC-derived glucose-responding  $\beta$ -like cells generated using  $\beta$ -cell differentiation protocol 2. Scale bar = 150  $\mu$ m. Values presented as the box plot. Centre line, the bounds of box and whiskers present the median, the first, third quartile, minimal and maximum, respectively. (e, f) Representative images (e) and cell proliferation rate (f) of DMSO or 1.6  $\mu$ M propargite treated  $\beta$ -like cells (n=3). Pancreatic  $\beta$ -like cells were stained for INS (green), proliferating cells were stained for Ki67 (red) and all the cells were counterstained by DAPI (blue). Scale bars, 200  $\mu$ m. Cell proliferation rates were defined as the percentage of Ki67<sup>+</sup>INS<sup>+</sup> cells/INS<sup>+</sup> cells. Values presented as mean $\pm$ S.D. (g) IC<sub>50</sub> of propargite on MIN6 cells. (h, i) Representative images (h) and cell proliferation rates (i) of DMSO or 1.6  $\mu$ M propargite treated MIN6 cells. MIN6 cells were stained for INS (green), proliferating cells were stained for Ki67 (red) and all the cells were counterstained by DAPI (blue). Scale bars, 200  $\mu$ m. Values presented as mean $\pm$ S.D. n.s. indicates a non-significant difference.

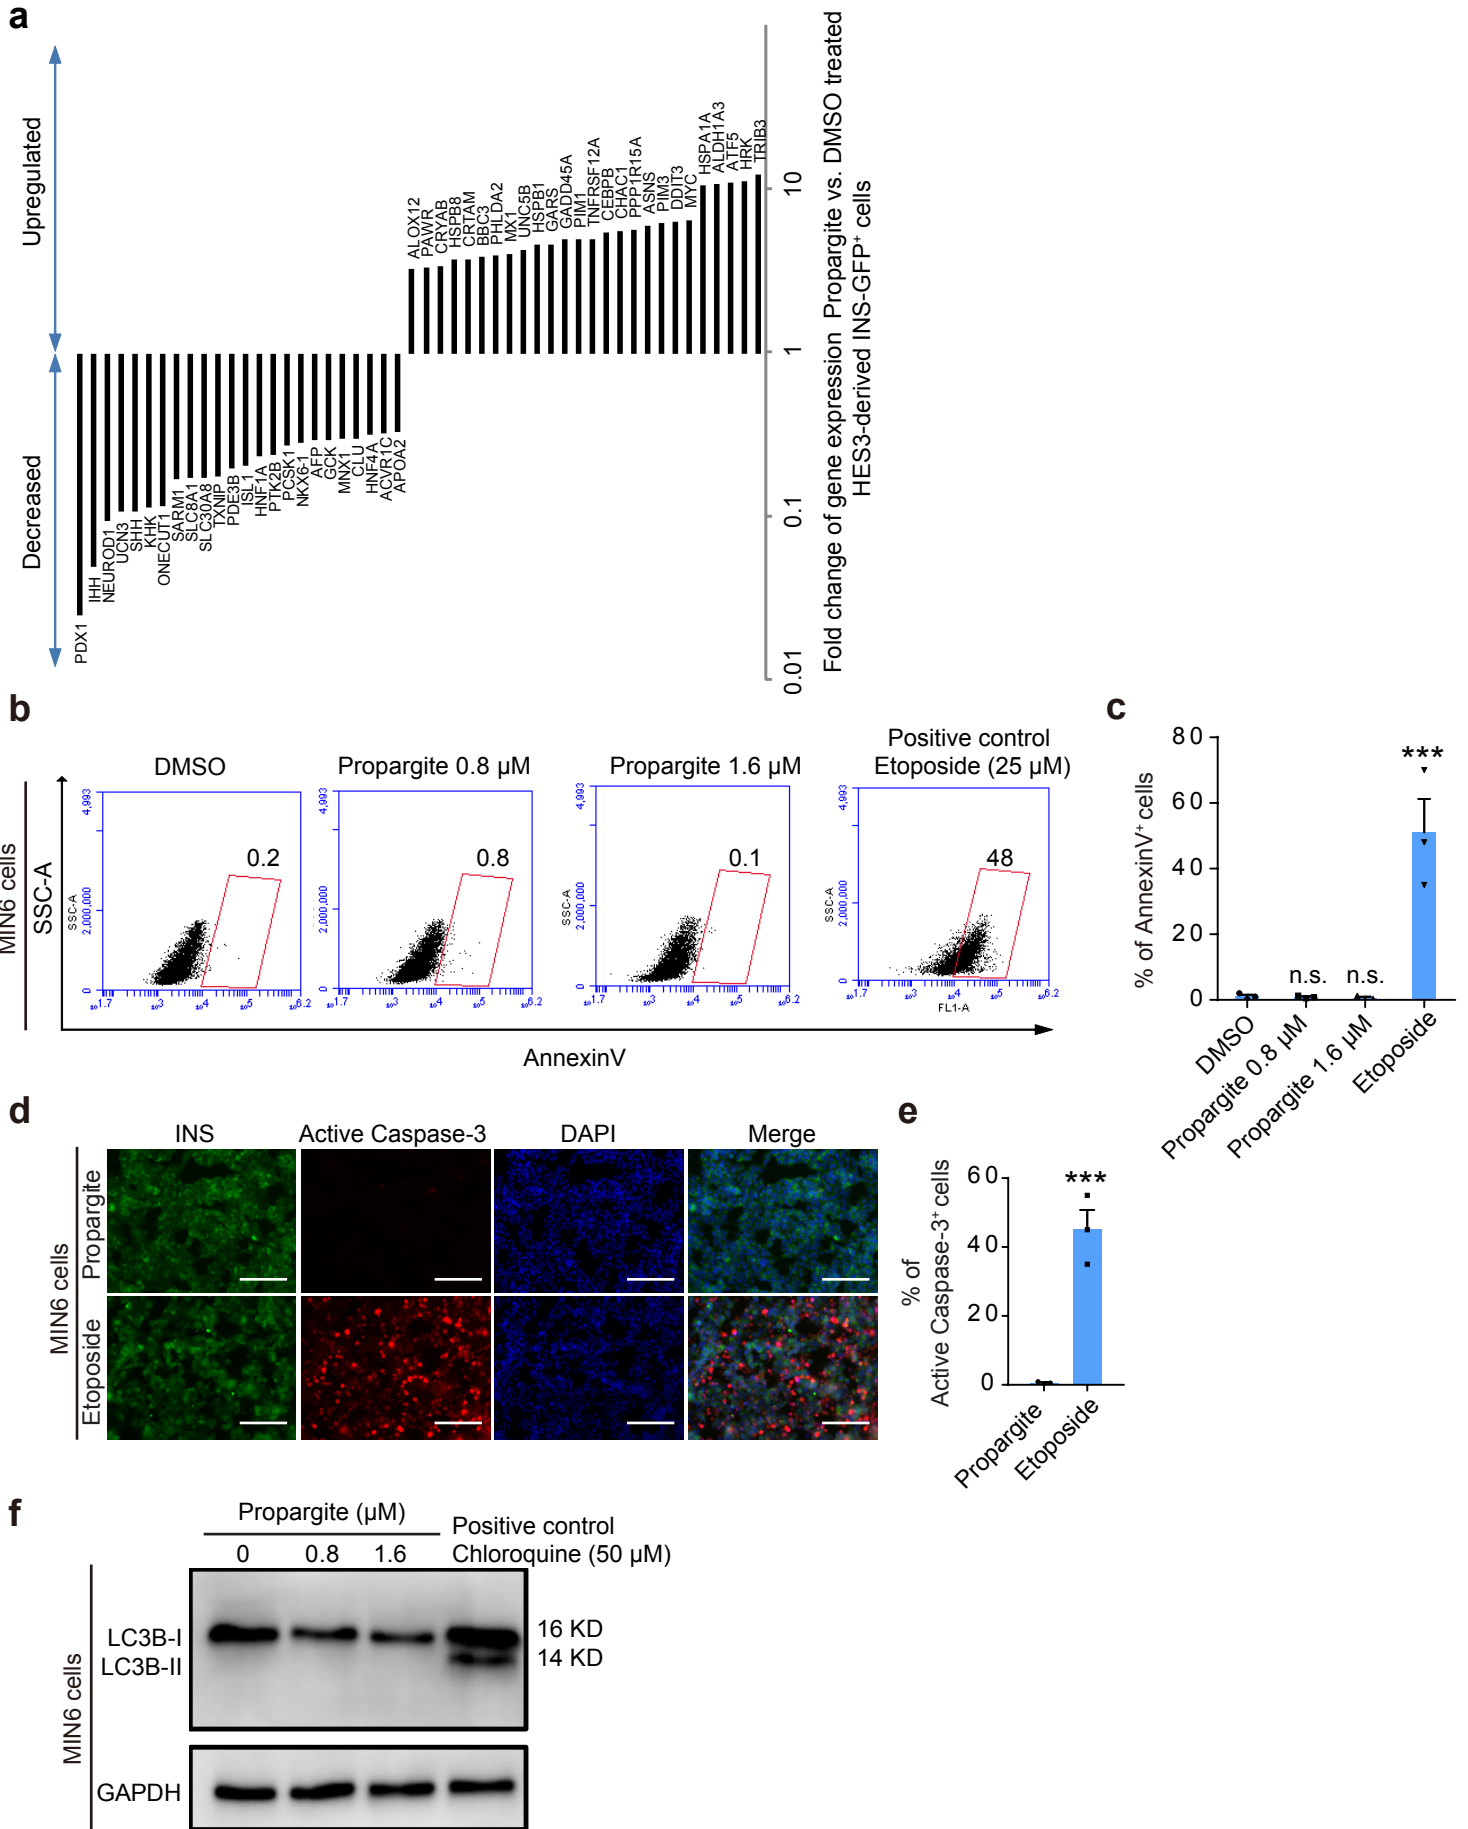

**Supplementary Figure 2. Propargite-induced  $\beta$ -cell death is not due to cell apoptosis or autophagy.**

(a) Up/down-regulated genes (fold change  $>3$ ) in the 1.6  $\mu\text{M}$  propargite-treated *INS*-GFP<sup>+</sup> cells. (b, c) Flow cytometry analysis (b) and quantification (c) of the percentage of AnnexinV<sup>+</sup> cells for different doses of propargite-treated MIN6 cells (n=3). 25  $\mu\text{M}$  Etoposide was used as a positive control. Values presented as mean $\pm$ S.D. (d, e) Immunocytochemistry analysis (d) and quantification (e) of the percentage of Active Caspase-3<sup>+</sup> cells in 1.6  $\mu\text{M}$  propargite treated MIN6 cells (n=3). 25  $\mu\text{M}$  Etoposide used as a positive control. Scale bars, 200  $\mu\text{m}$ . Values presented as mean $\pm$ S.D. (f) Western blot analysis of autophagy marker (LC3B-II) after 0.8  $\mu\text{M}$  or 1.6  $\mu\text{M}$  propargite exposure in MIN6 cells. 50  $\mu\text{M}$  Chloroquine was used as a positive control. GAPDH was used as a loading control. n.s. indicates a non-significant difference. *p* values calculated by unpaired two-tailed Student's t-test was \*\*\* $p < 0.001$ .

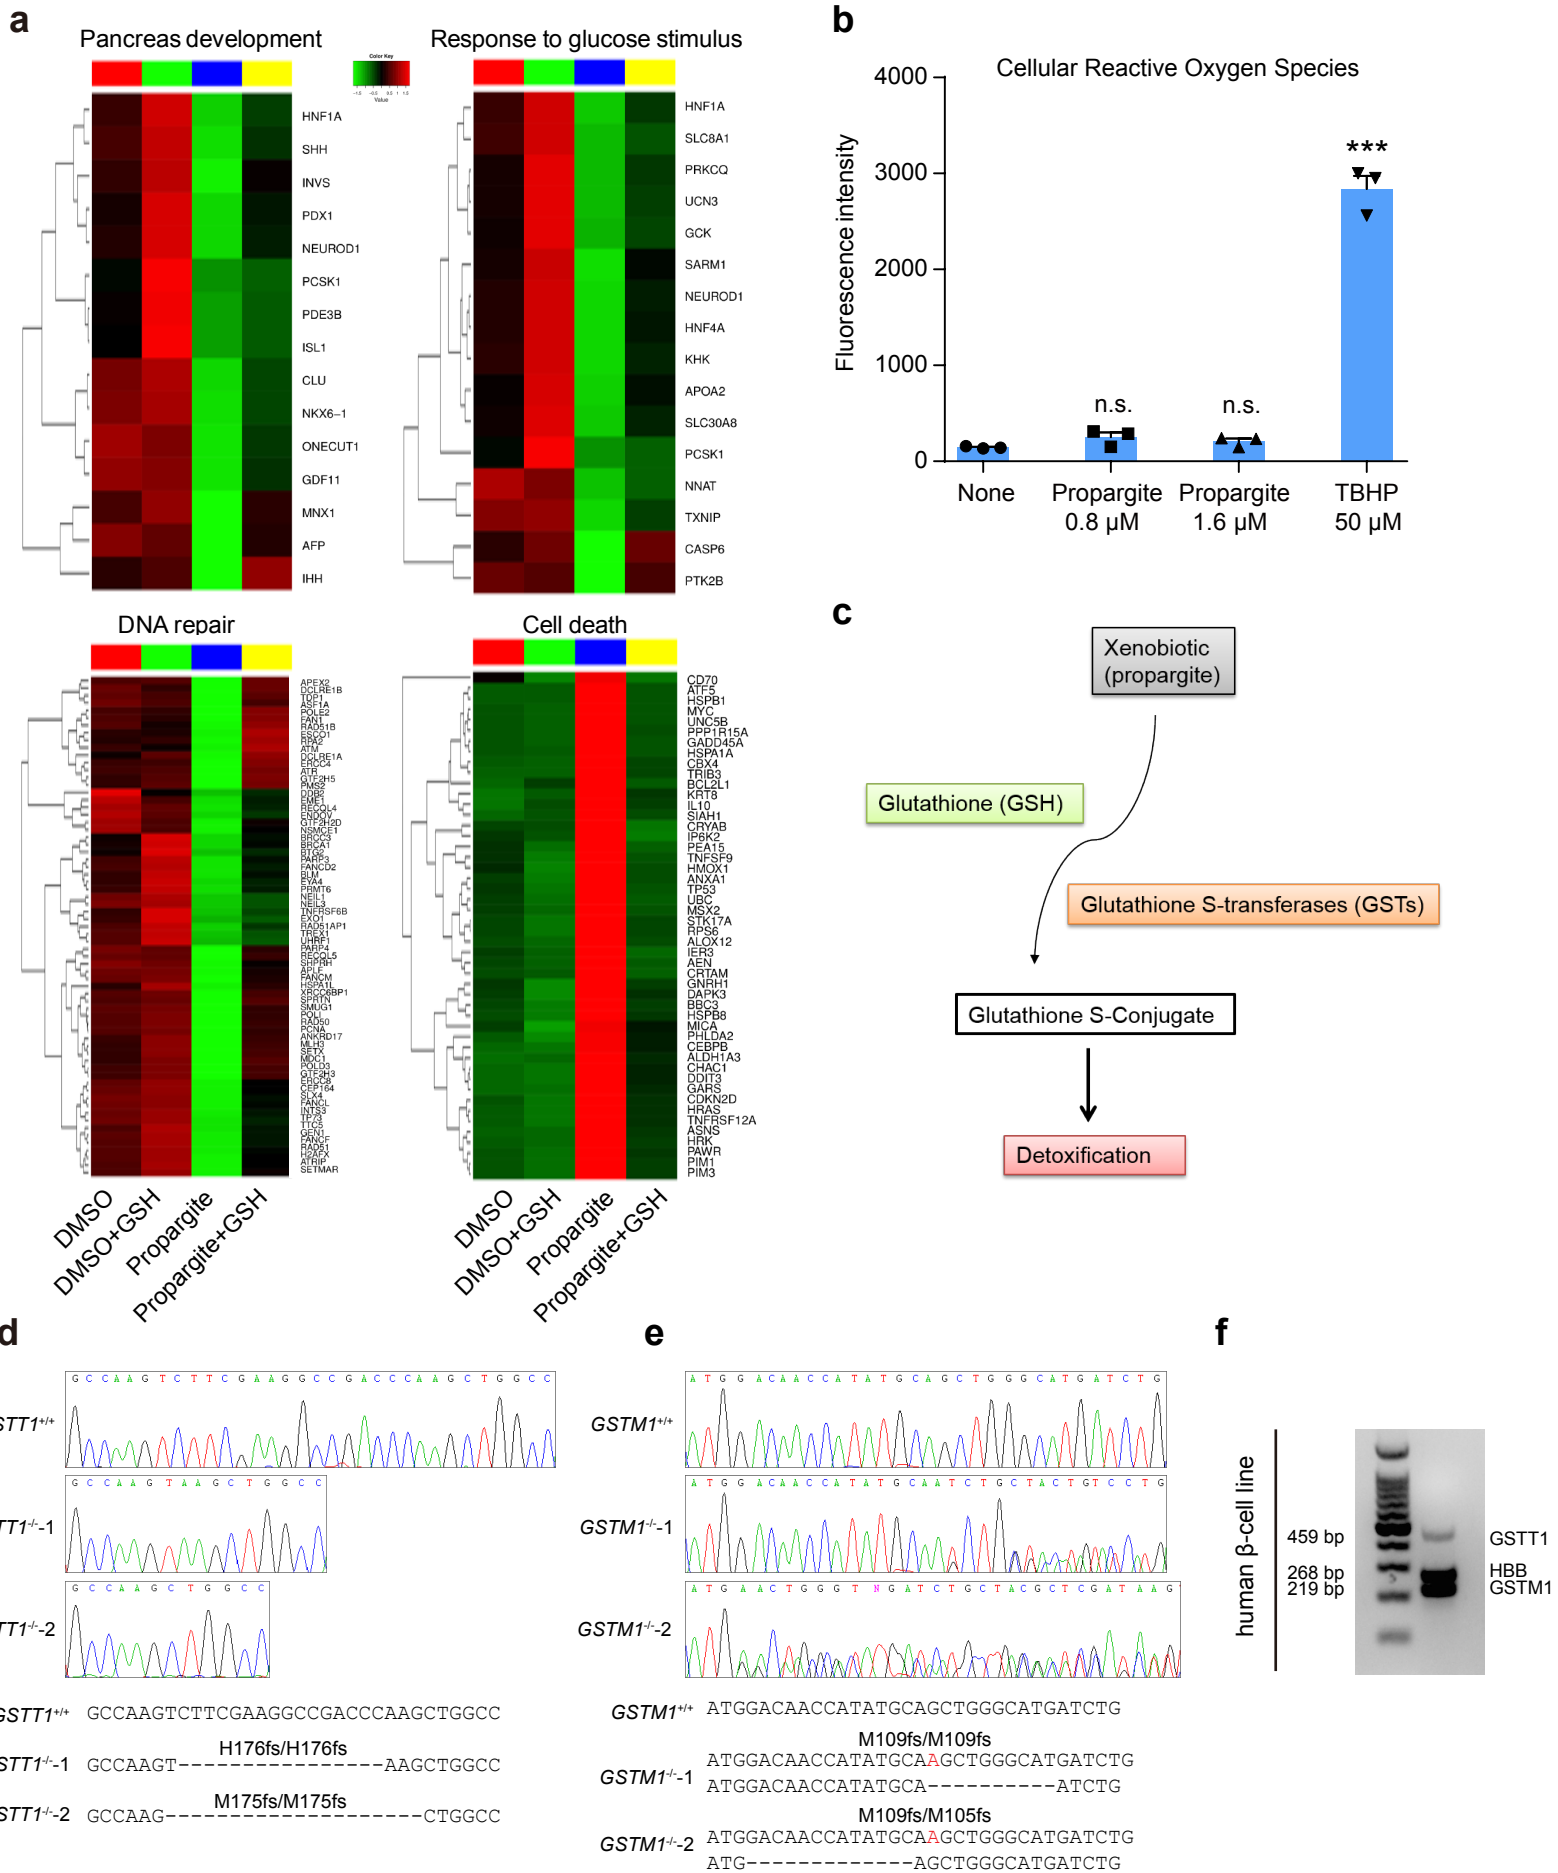

**Supplementary Figure 3. GSH rescues the transcriptional alteration of propargite treated INS<sup>+</sup> cells, through an anti-oxidant independent manner.**

(a) Transcript profiling showed that the transcriptional alteration in propargite-treated *INS*-GFP<sup>+</sup> cells were largely reversed by GSH, including gene expression related to pancreas development, pancreas function, DNA repair, and cell death. (b) Cellular Reactive Oxygen Species detection for different doses of propargite-treated MIN6 cells (n=3). 50 μM TBHP was used as a positive control. (c) Suggested mechanism for the GSH-dependent propargite detoxification pathway in rats. (d, e) Sequences of two representative biallelic mutants (*GSTT1*<sup>-/-</sup>-1 and *GSTT1*<sup>-/-</sup>-2) with frameshift mutations on *GSTT1* (d) and two representative biallelic mutants (*GSTMI*<sup>-/-</sup>-1 and *GSTMI*<sup>-/-</sup>-2) with frameshift mutations on *GSTMI* (e). (f) Genotype analysis of *GSTMI* and *GSTT1* in EndoC-βH1 cells. Values presented as mean±S.D. n.s. indicates a non-significant difference. *p* values calculated by unpaired two-tailed Student's t-test was \*\*\**p*<0.001.

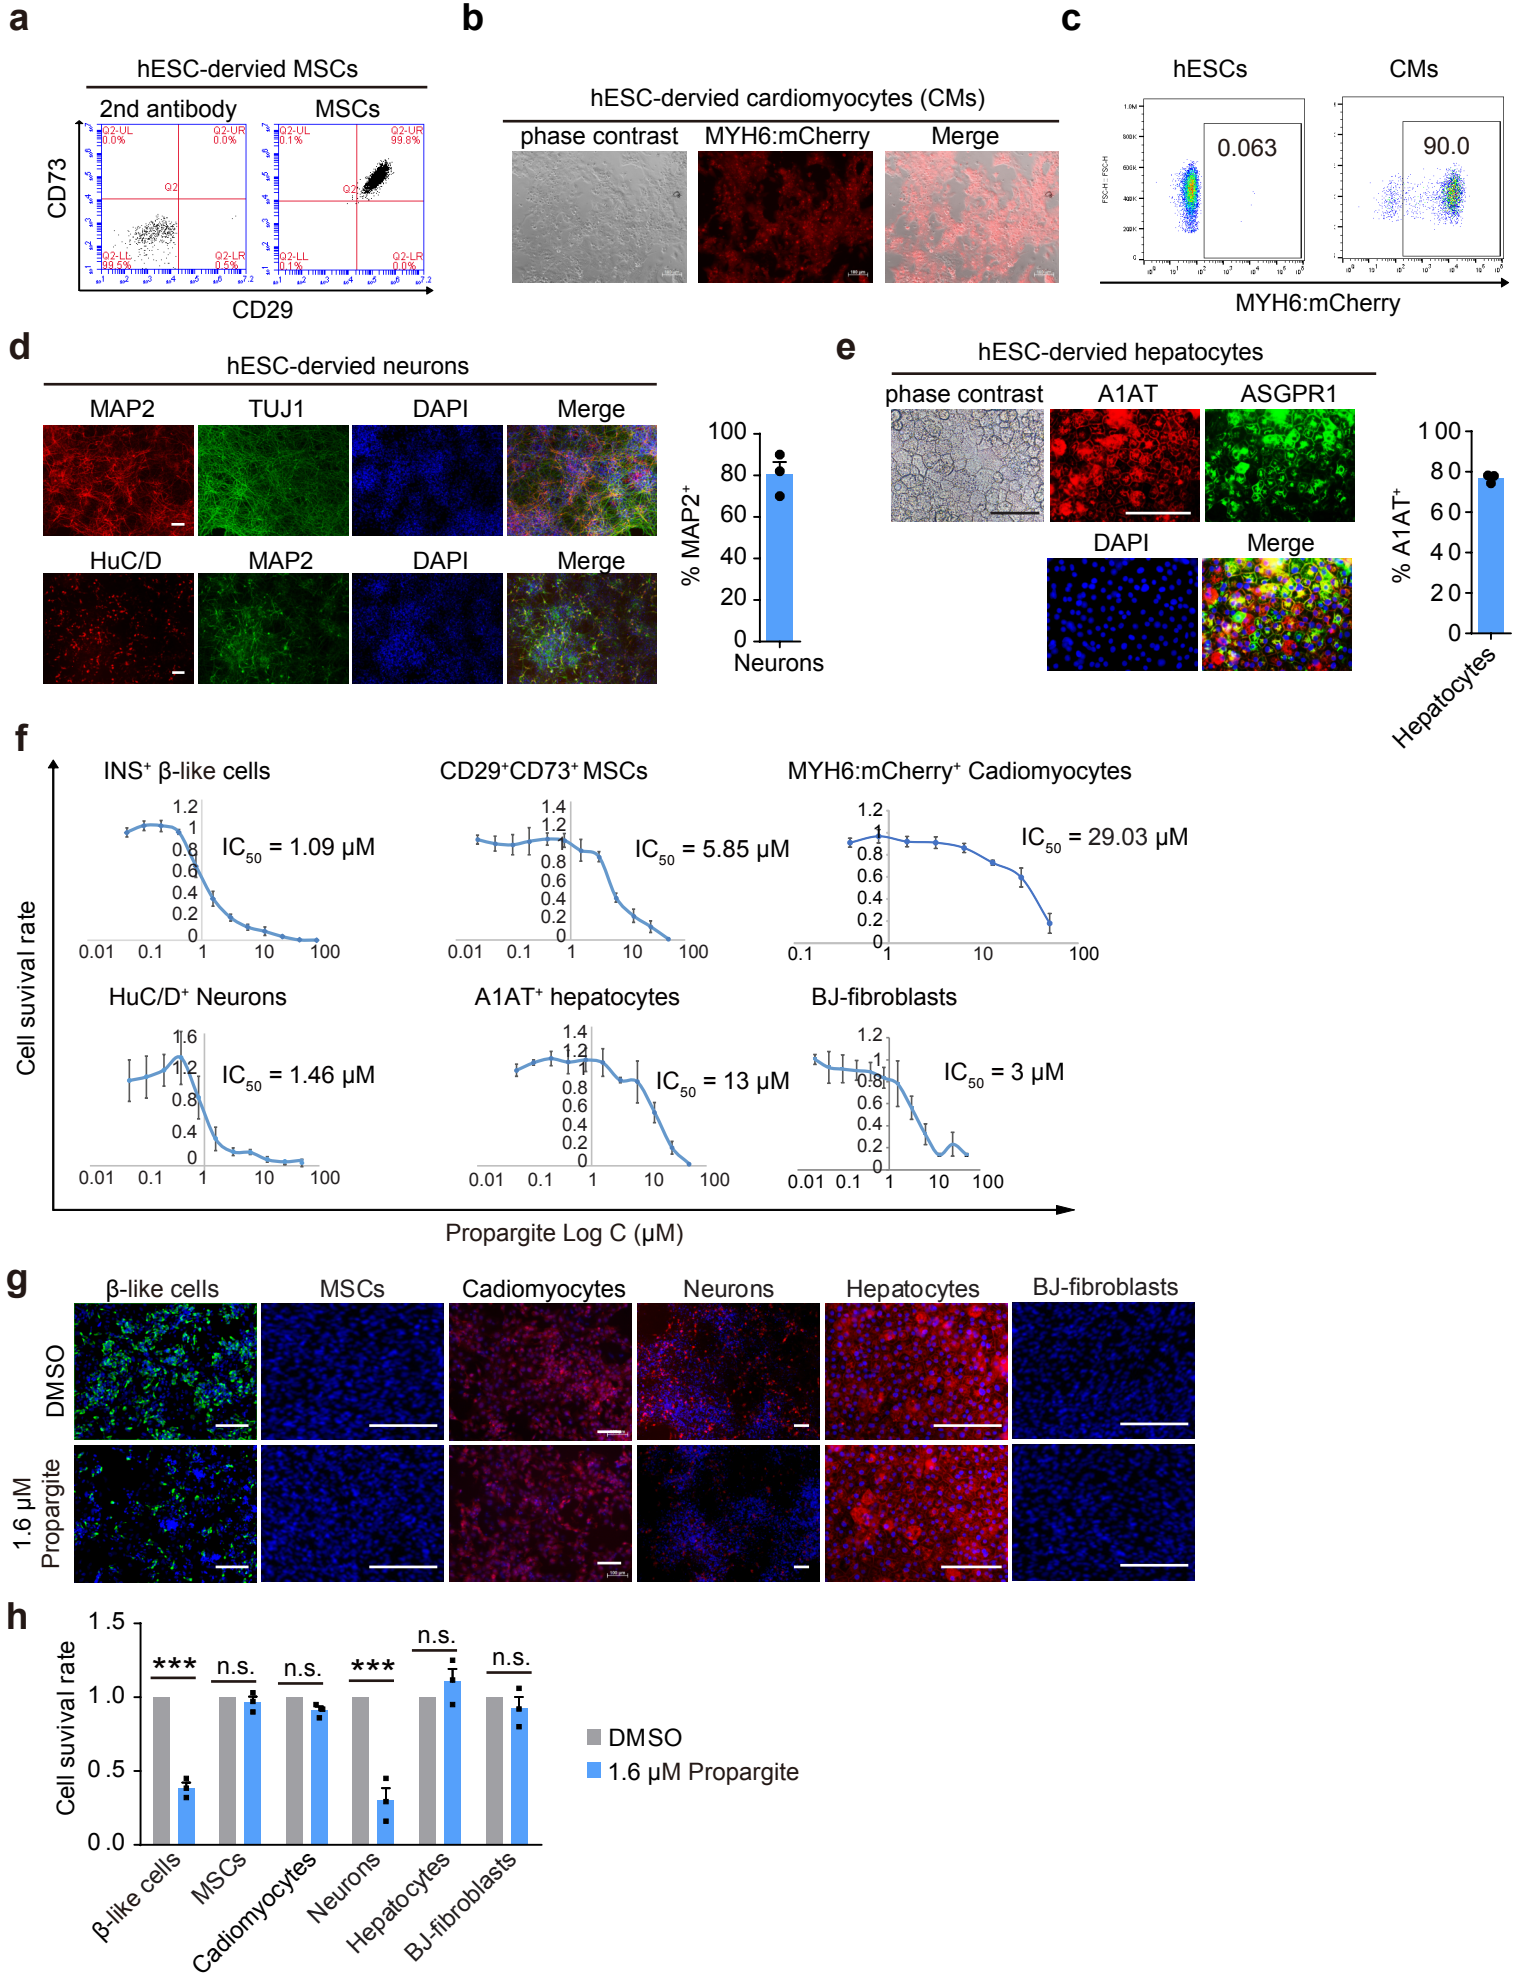

**Supplementary Figure 4. Assessment of the toxic effect of propargite on different type of cells derived from hESCs, showing that HuC/D<sup>+</sup> neurons are highly susceptible to propargite.**

(a) Flow cytometry characterization of CD29<sup>+</sup> and CD73<sup>+</sup> mesenchymal stem cells (MSCs) derived from H1 hESCs. (b-c) microscope image (b) and flow cytometry (c) characterization of cardiomyocytes expressing MYH6<sup>+</sup> derived from a MYH6:mCherry reporter hESC line. (d-e) Immunocytochemistry characterization of MAP2<sup>+</sup>/TUJ1<sup>+</sup> and HuC/D<sup>+</sup>/MAP2<sup>+</sup> neurons (d) and A1AT<sup>+</sup>/ASGPR1<sup>+</sup> hepatocytes (e) derived from H1 hESCs. All the cells were counterstained by DAPI (blue). Scale bars, 100  $\mu$ m. (f) Inhibition curve of propargite on pancreatic  $\beta$ -like cells, MSCs, cardiomyocytes, neurons, and hepatocytes derived from hESCs, and BJ-fibroblasts (n=3). Values presented as mean $\pm$ S.D. (g, h) Representative images (g), and survival rate (h) of different types of cells derived from hESCs and BJ-fibroblasts in response to 1.6  $\mu$ M propargite (n=3). All the cells were counterstained by DAPI (blue). Scale bars, 100  $\mu$ m. Values presented as mean $\pm$ S.D. n.s. indicates a non-significant difference. *p* values calculated by unpaired two-tailed Student's t-test was \*\*\**p*<0.001.



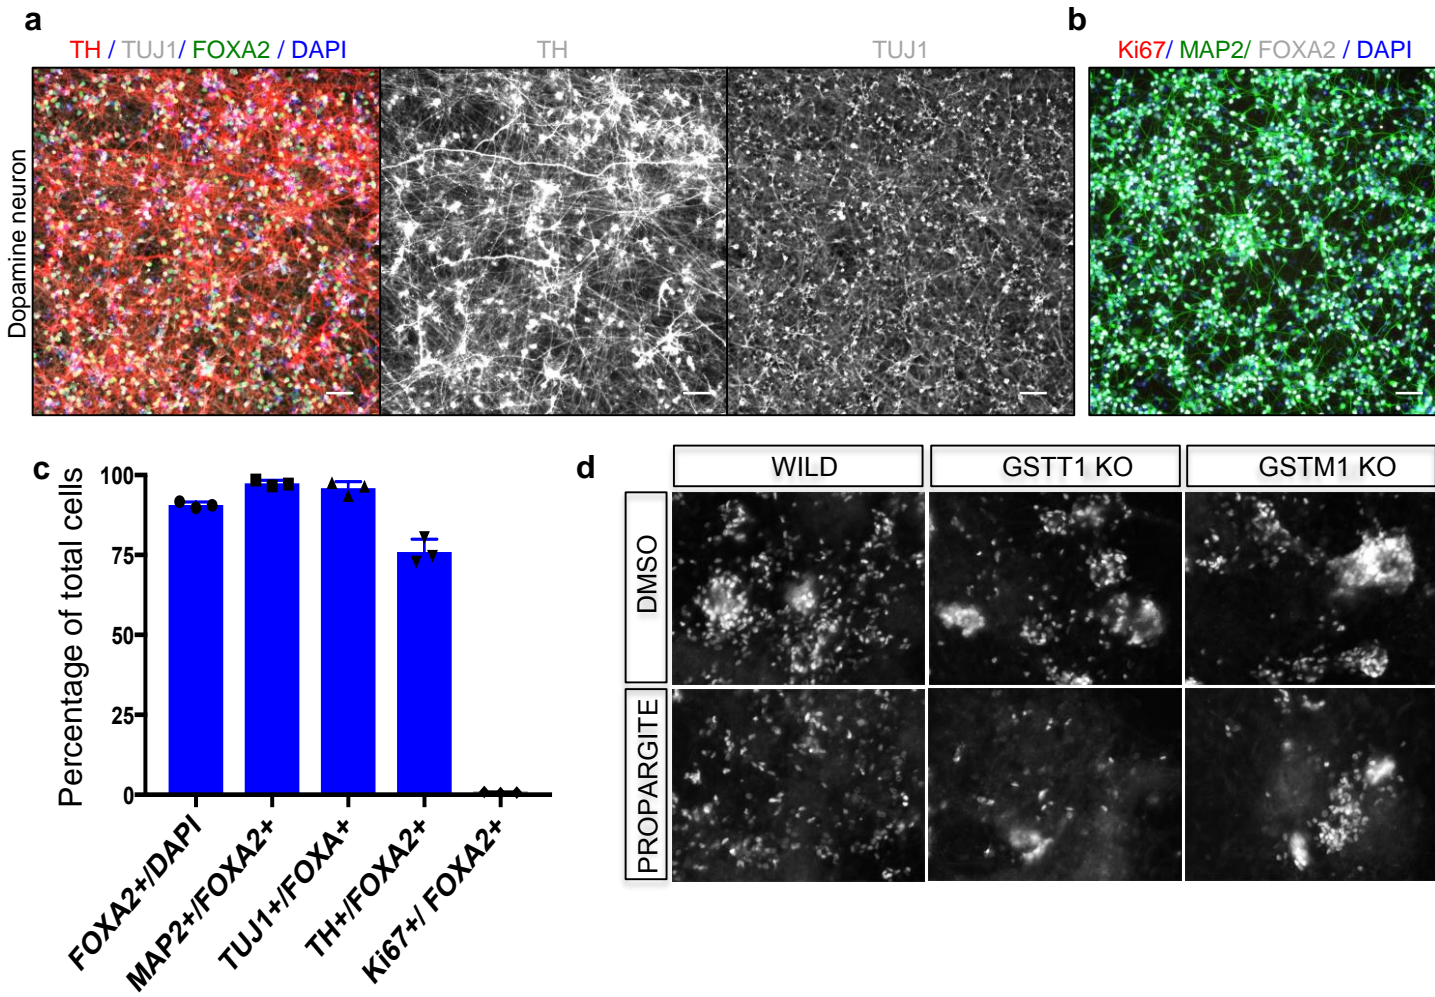

**Supplementary Figure 5. Characterization of hESC-derived midbrain dopamine (mDA) neurons treated with/without propargite.**

(a-c) More than 90% of hESC-derived mDA differentiated cells are FOXA2 positive. Among FOXA2 positive cells, more than 95% are MAP2 (a pan-neuronal marker) positive and 75% are TH (a mature DA marker which encodes late limit enzyme for dopamine production) positive, but less than 1% are Ki-67 (a marker for cell proliferation) positive. Values presented as mean±S.D. (d) Representative images of mDA differentiated FOXA2<sup>+</sup> cells treated with DMSO or propargite (3 μM) derived from isogenic wild type, *GSTT1*<sup>-/-</sup>, and *GSTM1*<sup>-/-</sup> H1 hESC.

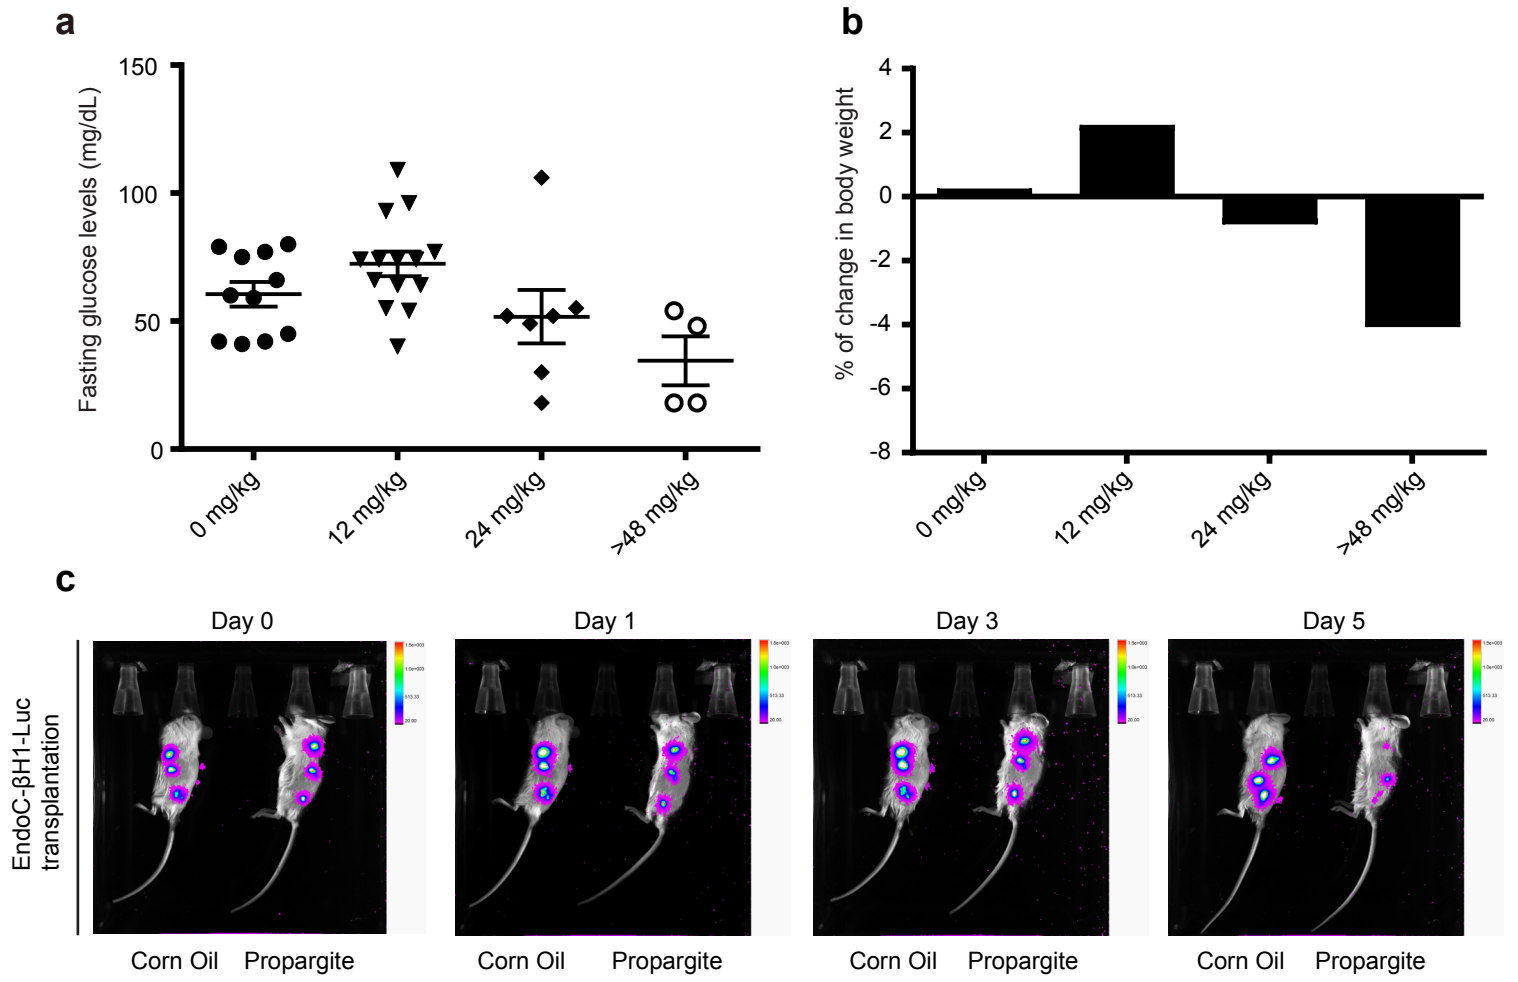

**Supplementary Figure 6. Propargite induces  $\beta$ -cell toxicity *in vivo*.**

(a, b) Fasting mouse blood glucose level levels (a) and % of change in body weight (b) in corn oil (control) or different doses of propargite treated mice. Values presented as mean $\pm$ S.D. (c) Representative images of *in vivo* imaging for luciferase signals from EndoC- $\beta$ H1-Luc cells transplanted mice administrated with corn oil (vehicle) or propargite during the 5-day course.

Fig.2c

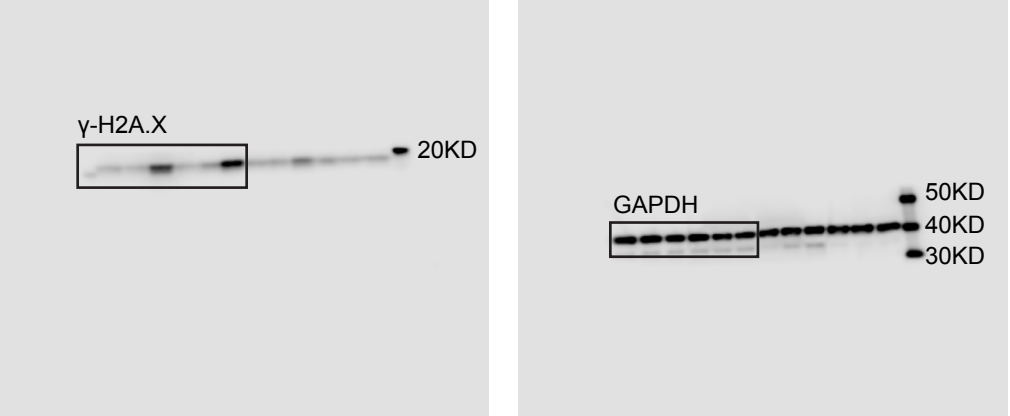

Fig.2d

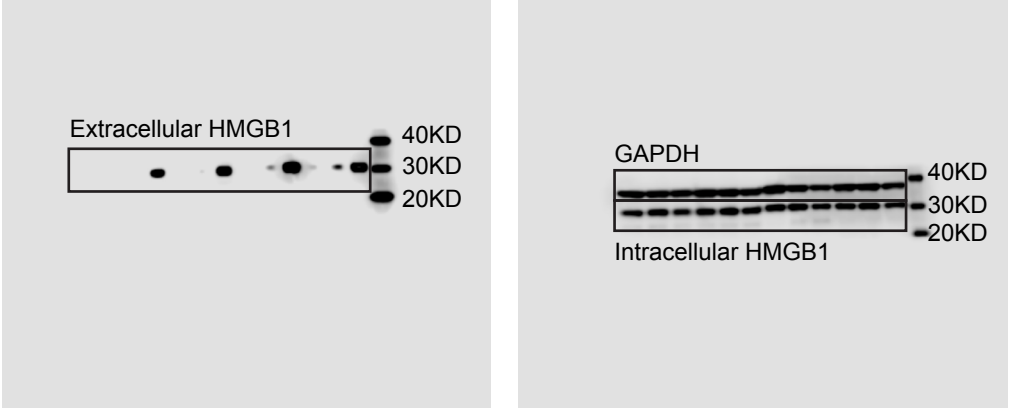

Fig.2e

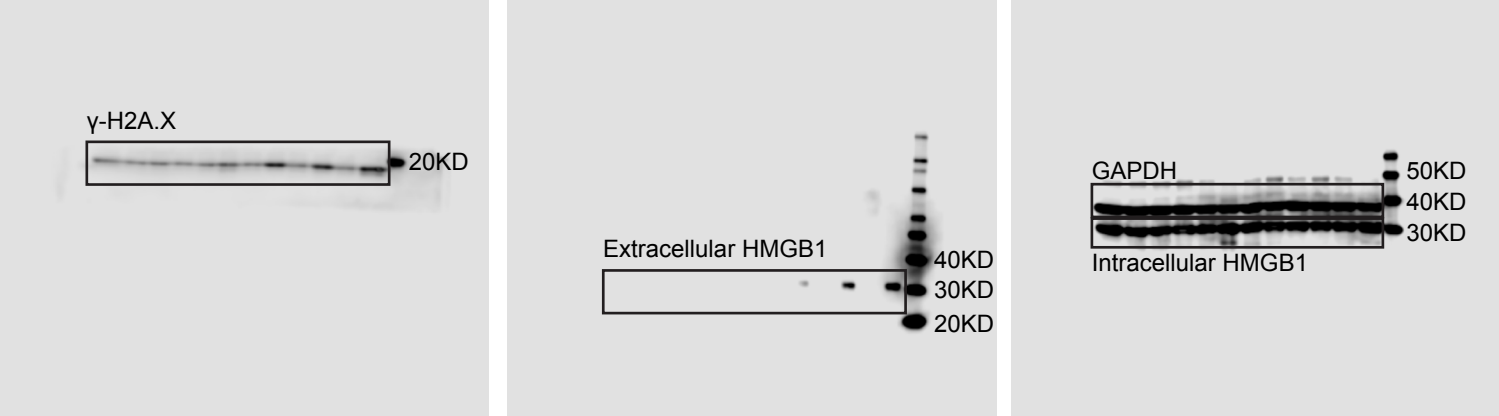

Fig.2m

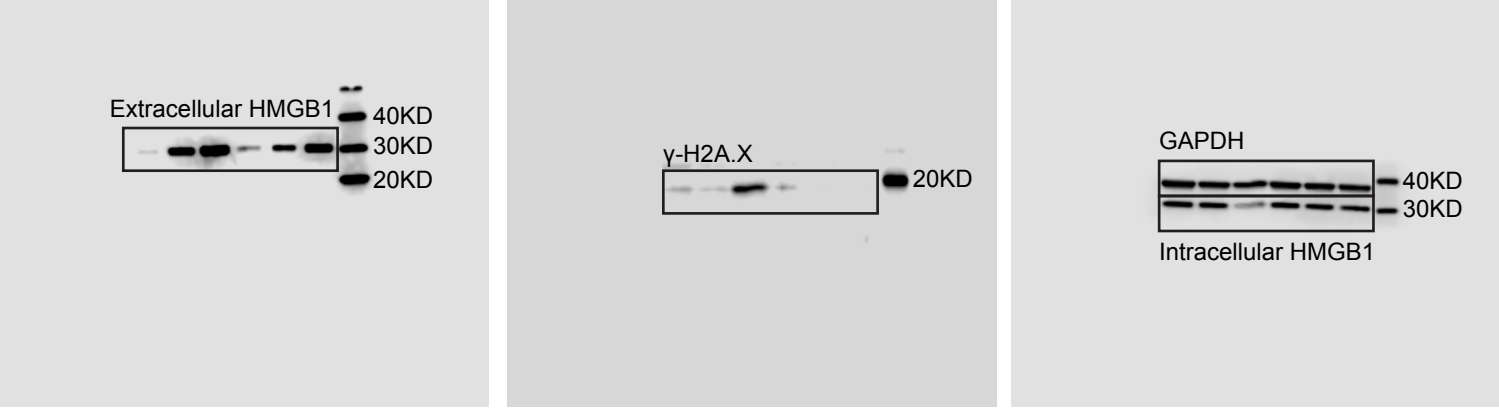

Fig. 3d

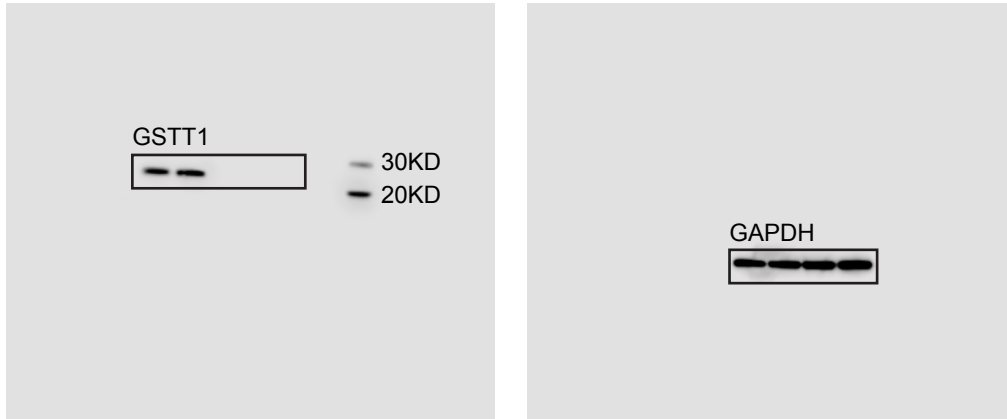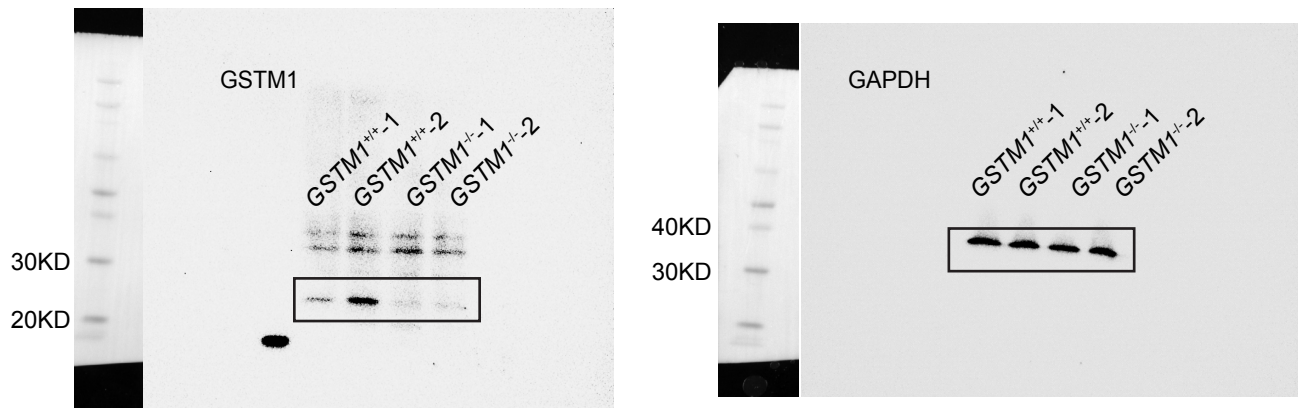

Fig. 3i

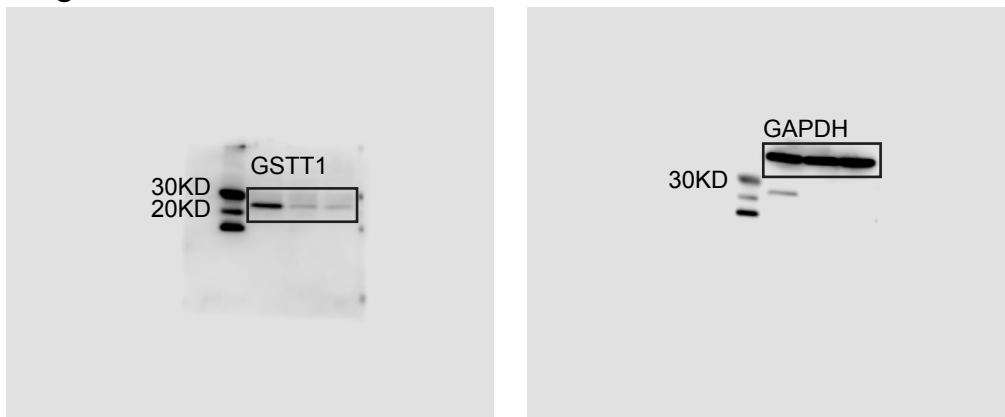

Fig. 4f

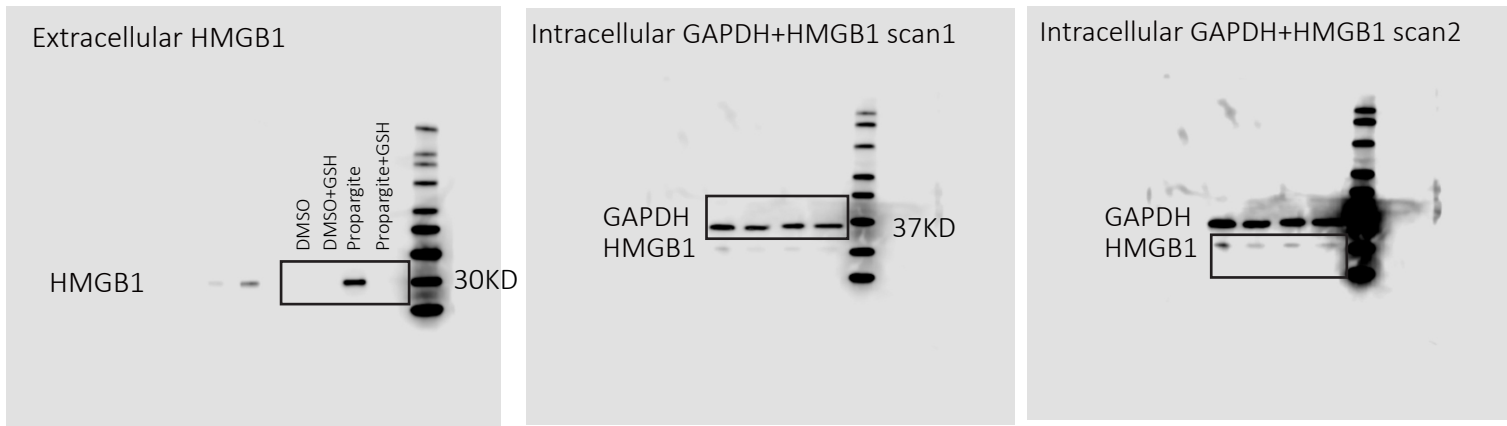

Supplementary Fig. 2f

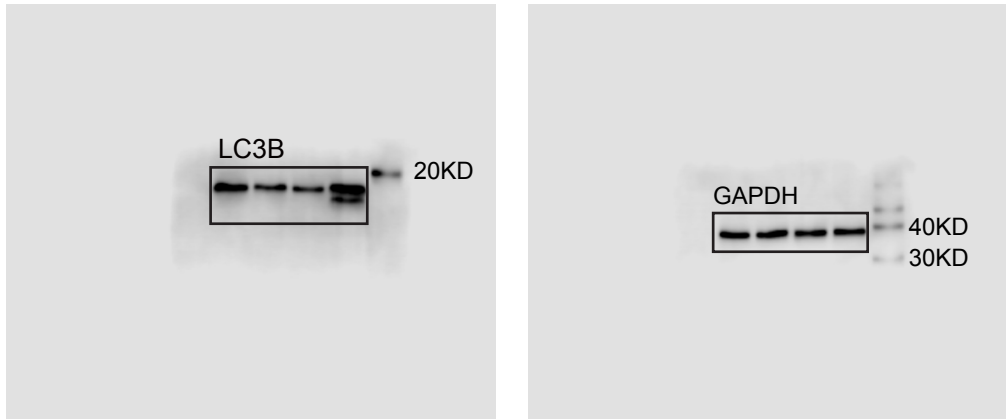

**Supplementary Figure 7. Uncropped blot images for Figure 2c, 2d, 2e, 2m, 3d, 3i, 4f and Supplementary Fig. 2f**



**Supplementary Table 1. qRT-PCR primers.**

| Gene           | Forward (5' to 3')    | Reverse (5' to 3')     |
|----------------|-----------------------|------------------------|
| <i>DDIT3</i>   | GGAAACAGAGTGGTCATTCCC | CTGCTTGAGCCGTTTCATTCTC |
| <i>GADD45A</i> | CAATTAGTGTCGTGCGGCC   | TTCTGCACTCACTCACAGGC   |

**Supplementary Table 2. sgRNA sequences for gene targeting.**

| Gene         | CRISPR             | sgRNA sequence (5' of PAM) | Targeted cells         |
|--------------|--------------------|----------------------------|------------------------|
| <i>GSTM1</i> | sg <i>GSTM1</i>    | ATGGACAACCATATGCAGCT       | hESCs                  |
| <i>GSTT1</i> | sg <i>GSTT1</i> -1 | TGGGTCGGCCTTCGAAGACT       | hESCs/ EndoC-βH1 cells |
|              | sg <i>GSTT1</i> -2 | CTGGCCATGATCCGGTGAGC       | EndoC-βH1 cells        |

**Supplementary Table 3. PCR and sequencing primers (Forward) used for genotyping the knockout hESC lines.**

| Gene         | Forward (5' to 3')   | Reverse (5' to 3')   |
|--------------|----------------------|----------------------|
| <i>GSTM1</i> | CAACGCCATCTTGTGCTACA | GTGTCCTAAGGTTGGTGGGA |
| <i>GSTT1</i> | TGGTCCCCAAATCAGATGCT | AAAGGACACAAGGCCTCAGT |

**Supplementary Table 4. Efficiency for the creation of biallelic knockout hESC lines.**

| Gene         | Sequenced sub-clone | Monoallelic knockout | Biallelic knockout | Biallelic knockout Efficiency |
|--------------|---------------------|----------------------|--------------------|-------------------------------|
| <i>GSTM1</i> | 22                  | 2                    | 15                 | 68%                           |
| <i>GSTT1</i> | 14                  | 0                    | 10                 | 71%                           |

**Supplementary Table 5. PCR primers for genomic DNA amplification.**

|                 | PCR primers (5' to 3')  |
|-----------------|-------------------------|
| <i>HBB</i> -F   | GAAGAGCCAAGGACAGGTAC    |
| <i>HBB</i> -R   | CAACTTCATCCACGTTACC     |
| <i>GSTM1</i> -F | GAACTCCCTGAAAAGCTAAAGC  |
| <i>GSTM1</i> -R | CTTGGGCTCAAATATACGGTGG  |
| <i>GSTT1</i> -F | TTCCTTACTGGTCCTCACATCTC |
| <i>GSTT1</i> -R | TCACCGGATCATGGCCAGCA    |

**Supplementary Table 1. qRT-PCR primers.**

| Gene           | Forward (5' to 3')    | Reverse (5' to 3')     |
|----------------|-----------------------|------------------------|
| <i>DDIT3</i>   | GGAAACAGAGTGGTCATTCCC | CTGCTTGAGCCGTTTCATTCTC |
| <i>GADD45A</i> | CAATTAGTGTCGTGCGGCC   | TTCTGCACTCACTCACAGGC   |

**Supplementary Table 2. sgRNA sequences for gene targeting.**

| Gene         | CRISPR             | sgRNA sequence (5' of PAM) | Targeted cells         |
|--------------|--------------------|----------------------------|------------------------|
| <i>GSTM1</i> | sg <i>GSTM1</i>    | ATGGACAACCATATGCAGCT       | hESCs                  |
| <i>GSTT1</i> | sg <i>GSTT1</i> -1 | TGGGTCGGCCTTCGAAGACT       | hESCs/ EndoC-βH1 cells |
|              | sg <i>GSTT1</i> -2 | CTGGCCATGATCCGGTGAGC       | EndoC-βH1 cells        |

**Supplementary Table 3. PCR and sequencing primers (Forward) used for genotyping the knockout hESC lines.**

| Gene         | Forward (5' to 3')   | Reverse (5' to 3')   |
|--------------|----------------------|----------------------|
| <i>GSTM1</i> | CAACGCCATCTTGTGCTACA | GTGTCCTAAGGTTGGTGGGA |
| <i>GSTT1</i> | TGGTCCCCAAATCAGATGCT | AAAGGACACAAGGCCTCAGT |

**Supplementary Table 4. Efficiency for the creation of biallelic knockout hESC lines.**

| Gene         | Sequenced sub-clone | Monoallelic knockout | Biallelic knockout | Biallelic knockout Efficiency |
|--------------|---------------------|----------------------|--------------------|-------------------------------|
| <i>GSTM1</i> | 22                  | 2                    | 15                 | 68%                           |
| <i>GSTT1</i> | 14                  | 0                    | 10                 | 71%                           |

**Supplementary Table 5. PCR primers for genomic DNA amplification.**

|                 | PCR primers (5' to 3')  |
|-----------------|-------------------------|
| <i>HBB</i> -F   | GAAGAGCCAAGGACAGGTAC    |
| <i>HBB</i> -R   | CAACTTCATCCACGTTACC     |
| <i>GSTM1</i> -F | GAACTCCCTGAAAAGCTAAAGC  |
| <i>GSTM1</i> -R | CTTGGGCTCAAATATACGGTGG  |
| <i>GSTT1</i> -F | TTCCTTACTGGTCCTCACATCTC |
| <i>GSTT1</i> -R | TCACCGGATCATGGCCAGCA    |
